# Supplementary material for: Diagnostic Yield of Epilepsy Panel Testing in Patients With Seizure Onset Within the First Year of Life
Source: Front Neurol. 2019 Sep 13;10:988. doi: 10.3389/fneur.2019.00988 (PMC6753218; doi:10.3389/fneur.2019.00988)
Supplement: Supplementary file 1 [file Table_1.XLSX]

## Sheet: Sheet1
Table S1. Clinical features of 112 study cohorts.
Case	Age at last follow-up (yr)	Age at seizure onset	Seizure type	Fever sensitivity	Developmental delay before seizure onset	Development or cognitive outcome	Drug resistance	Family history	Epilepsy syndrome
Case 1	2.70411	6 months	myoclonic, atypicalabsence	no	yes	ID	resistant	negative	unclassified
Case 2	7.59452	3 days	focal clonic, GTC	no	yes	ID	resistant	negative	unclassified
Case 3	15.9233	4 months	GTC, atypical absence	yes	no	ID	resistant	negative	Dravet
Case 4	3.07945	3 months	focal clonic, myoclonic	no	yes	delay	resistant	familial (sister)	unclassified
Case 5	14.1151	10 months	GTC	yes	no	ID	resistant	negative	Dravet
Case 6	8.17534	7 months	myoclonic	yes	no	ID	resistant	negative	Dravet
Case 7	4.06027	3 days	focal tonic, tonic, epileptic spasms	no	yes	delay	resistant	negative	Ohtahara
Case 8	29.3671	3 months	focal tonic	yes	yes	ID	resistant	negative	unclassified
Case 9	0.172603	1 month	focal, focal tonic	no	no	mild delay	self limited	familial (father)	unclassified
Case 10	4.89041	6 months	focal clonic, spasms, GTC	no	no	delay	resistant	negative	unclassified
Case 11	5.4	2 days	focal clonic, GTC	no	no	ID	responsive	negative	unclassified
Case 12	7.29315	2 months	GTC, myoclonic	no	no	ID	resistant	familial (mother)	unclassified
Case 13	10.0575	6 months	GTC	yes	no	ID	resistant	negative	Dravet
Case 14	0.808219	2 days	focal clonic, tonic, epileptic spasms	no	no	delay	resistant	negative	Ohtahara
Case 15	7.09589	8 months	focal clonic, GTC	yes	no	ID	resistant	negative	unclassified
Case 16	2.17808	4 months	GTC	no	no	normal	self limited	negative	benign infantile
Case 17	1.04932	3 days	focal clonic, tonic, myoclonic	no	yes	delay	resistant	negative	Ohtahara
Case 18	1.05753	2 months	focal clonic, tonic	no	no	mild delay	self limited	negative	unclassified
Case 19	1.69315	4 months	focal clonic, GTC	no	no	ID	responsive	negative	unclassified
Case 20	32.6521	8 months	atypical absence	yes	yes	ID	resistant	negative	unclassified
Case 21	3.90685	2 months	focal, focal tonic	no	no	delay	resistant	negative	unclassified
Case 22	7.27123	8 months	focal clonic, GTC	yes	no	ID	resistant	negative	Dravet
Case 23	16.9507	3 months	focal clonic, atonic	yes	yes	ID	resistant	familial (brother)	Dravet
Case 24	18.9151	8 months	GTC, atonic, myoclonic	yes	no	ID	resistant	negative	Dravet
Case 25	1.73425	1 day	tonic, focal clonic, epileptic spasms	yes	yes	delay	resistant	negative	Ohtahara
Case 26	8.49315	3 months	GTC, focal clonic	yes	no	ID	resistant	negative	Dravet
Case 27	1.56712	21 days	focal, focal clonic	yes	no	mild delay	resistant	negative	unclassified
Case 28	1.8	7 days	focal, focal tonic	no	no	mild delay	self limited	negative	unclassified
Case 29	5.72603	10 months	GTC, myoclonic	yes	no	ID	responsive	familial (brother)	Dravet
Case 30	24.0055	8 months	focal, focal tonic	yes	no	ID	resistant	negative	Dravet
Case 31	2.51507	2 days	focal clonic, focal tonic, myoclonic	no	yes	delay	resistant	negative	unclassified
Case 32	0.778082	4 days	focal clonic	no	no	normal	self limited	negative	unclassified
Case 33	11.6877	5 months	GTC, atypical absence	no	no	ID ASD	responsive	negative	unclassified
Case 34	5.75068	3 months	focal clonic, GTC	no	yes	ID	responsive	familial (father)	unclassified
Case 35	1.28767	8 months	focal clonic, myoclonic	no	no	mild delay	resistant	negative	unclassified
Case 36	4.7863	3 months	focal clonic, GTC	no	no	delay	resistant	negative	unclassified
Case 37	0.912329	10 days	focal clonic, focal tonic	no	yes	delay	resistant	negative	unclassified
Case 38	3.26027	7 months	focal clonic, GTC	no	yes	delay	resistant	negative	unclassified
Case 39	2.01644	2 days	focal clonic, GTC	no	no	normal	self limited	familial (father)	benign familial neonatal
Case 40	3.77808	12 months	focal clonic	yes	no	delay	responsive	negative	Dravet
Case 41	8.5	6 months	focal, GTC	yes	no	mild delay	resistant	negative	unclassified
Case 42	7.00274	10 months	focal	no	no	ID	resistant	negative	unclassified
Case 43	0.608219	3 monhts	GTC	no	no	normal	self limited	familial (father)	benign familial infantile
Case 44	9.70959	9 months	focal	no	no	normal	resistant	negative	unclassified
Case 45	0.586301	3 days	focal clonic, GTC	no	no	delay	self limited	negative	unclassified
Case 46	1.52877	5 months	focal, focal tonic, GTC	no	yes	delay	resistant	negative	unclassified
Case 47	1.65205	4 months	focal, GTC	no	no	delay	responsive	negative	unclassified
Case 48	2.42466	3 months	focal clonic, GTC	yes	no	ID	resistant	familial (father)	Dravet
Case 49	5.83288	6 months	clonic, GTC	yes	no	delay	resistant	negative	Dravet
Case 50	2.27945	2 days	focal tonic, GTC	no	no	normal	self limited	familial (father)	benign familial neonatal
Case 51	5.46027	5 months	GTC	no	no	normal	self limited	familial (sister)	benign familial infantile
Case 52	0.956164	8 months	focal, focal clonic	no	no	mild delay	resistant	negative	unclassified
Case 53	1.28219	3 months	GTC	no	yes	delay	resistant	familial (brother)	unclassified
Case 54	11.0904	10 months	focal clonic, GTC	yes	no	ID	resistant	familial (mother)	Dravet
Case 55	1.16712	3 months	focal, GTC	no	no	normal	self limited	negative	benign infantile
Case 56	18.2438	8 months	GTC	yes	no	ID	resistant	negative	Dravet
Case 57	1.10411	3 days	focal clonic	no	no	normal	self limited	familial (sister)	benign familial neonatal
Case 58	1.03014	5 months	focal clonic, GTC	no	no	normal	self limited	negative	benign infantile
Case 59	1.09589	6 months	GTC	no	no	normal	self limited	familial (mother)	benign familial infantile
Case 60	0	6 months	GTC	no	no	normal	self limited	familial (sister)	benign familial infantile
Case 61	2.0137	2 months	focal clonic	no	no	normal	self limited	negative	benign infantile
Case 62	3.04932	3 months	GTC	no	no	normal	self limited	negative	benign infantile
Case 63	9.93151	7 monhts	focal tonic, GTC	yes	no	ID	resistant	familial (mother)	Dravet
Case 64	1.93425	9 months	GTC	no	no	delay	resistant	negative	unclassified
Case 65	15.1452	10 months	GTC	yes	no	ID ASD	resistant	negative	Dravet
Case 66	1.32877	1 day	focal clonic, focal tonic	no	no	delay	resistant	negative	unclassified
Case 67	2.62466	4 months	focal, GTC	no	no	normal	self limited	negative	benign infantile
Case 68	4.5	7 days	focal, focal clonic	no	no	normal	self limited	familial (sister)	benign familial neonatal
Case 69	3.06301	5 months	focal, GTC	no	no	delay	resistant	negative	unclassified
Case 70	6.52329	12 months	GTC	yes	yes	ID	resistant	negative	unclassified
Case 71	4.57808	4 months	focal, focal clonic	no	no	normal	self limited	negative	benign infantile
Case 72	1.00548	6 months	GTC	yes	no	normal	self limited	negative	benign infantile
Case 73	10.6411	6 monhts	GTC	yes	no	ID	responsive	negative	unclassified
Case 74	0.523288	3 days	focal clonic	no	no	mild delay	responsive	familial (sister)	unclassified
Case 75	0.643836	4 months	focal	no	yes	delay	resistant	negative	unclassified
Case 76	0.876712	3 months	foca, GTC	no	no	normal	self limited	familial (father)	benign familial infantile
Case 77	5.71781	4 monhts	focal clonic	no	no	normal	self limited	negative	benign infantile
Case 78	13.5	5 months	GTC	no	no	normal	self limited	familial (brother)	benign familial infantile
Case 79	6.5	3 months	focal, GTC	yes	no	delay	resistant	negative	unclassified
Case 80	1.8137	1 day	focal tonic	no	no	normal	self limited	negative	unclassified
Case 81	1.25479	3 monhts	focal, GTC	no	no	normal	self limited	familial (mother)	benign familial infantile
Case 82	6.29315	6 months	focal, GTC	yes	no	delay	resistant	negative	Dravet
Case 83	12.5342	1 month	GTC	no	no	ADHD	responsive	familial (father, sister)	unclassified
Case 84	7.8	6 months	focal, GTC	yes	no	delay	resistant	negative	unclassified
Case 85	0.575342	2 days	focal clonic	no	yes	normal	self limited	negative	unclassified
Case 86	1.36164	5 months	focal	no	no	mild delay	self limited	negative	unclassified
Case 87	3.07671	4 monhts	focal	no	no	delay	resistant	negative	unclassified
Case 88	4.17808	1 month	focal clonic, GTC	yes	no	delay	resistant	negative	Dravet
Case 89	3.96986	3 months	GTC, absence, myoclonic	no	no	ID	resistant	negative	unclassified
Case 90	0.339726	3 months	focal, focal clonic	no	no	normal	self limited	familial (mother)	benign familial infantile
Case 91	3.5863	4 monhts	myoclonic	no	no	normal	self limited	negative	BMEI
Case 92	6.10411	2 months	GTC	yes	no	ID	resistant	negative	Dravet
Case 93	1.58356	1 month	focal	no	no	delay	responsive	negative	unclassified
Case 94	4.75616	12 months	focal	no	no	normal	responsive	negative	unclassified
Case 95	1.95616	10 months	focal clonic	yes	no	normal	resistant	negative	Dravet
Case 96	1.46575	9 months	focal	yes	no	mild delay	resistant	negative	unclassified
Case 97	15.8027	3 months	GTC	no	no	ID	responsive	negative	unclassified
Case 98	1.94521	1 month	focal clonic	no	no	delay	responsive	negative	unclassified
Case 99	1.82192	8 months	GTC	yes	no	normal	self limited	familial (father)	unclassified
Case 100	6.93151	7 months	focal tonic	yes	no	normal	self limited	familial (mother)	benign familial infantile
Case 101	2.15342	2 months	myoclonic, GTC	yes	no	delay	resistant	negative	Dravet
Case 102	3.89041	12 months	focal tonic, myoclonic	no	no	delay	resistant	negative	unclassified
Case 103	6.8	9 months	focal, GTC	yes	no	delay	resistant	negative	unclassified
Case 104	2.26849	2 months	GTC	no	no	delay	resistant	negative	unclassified
Case 105	0.747945	5 months	focal	no	no	normal	self limited	familial (mother)	benign familial infantile
Case 106	18.0219	1 month	focal	no	no	ID	resistant	negative	unclassified
Case 107	1.5863	5 months	focal	no	no	normal	self limited	negative	benign infantile
Case 108	1.66027	4 months	focal	no	no	normal	self limited	familial (brother)	benign familial infantile
Case 109	1.05205	3 months	focal	no	no	delay	resistant	negative	unclassified
Case 110	1.67945	2 months	focal, focal tonic	no	no	normal	responsive	negative	unclassified
Case 111	18.7233	3 months	focal clonic	no	no	delay	resistant	negative	unclassified
Case 112	34.4685	7 months	focal	no	no	ID	resistant	negative	unclassified
ADHD, attention deficit hyperactivity disorder; ASD, autism spectrum disorder; BMEI, benign myoclonic epilepsy in infancy; ID, intellectual disability; GTC, generalized tonic clonic seizure
